# Supplementary material
Source: publisher site journal article supplement (http://www.spandidos-publications.com/5548/downloadSupplementary)

Figure S1. (A) The top 13 downregulated and top 13 upregulated genes upon ELF5 overexpression in LLC cells are shown. (B) Volcano plot of the RNA-sequencing results for LLC cells following either the overexpression or presence of ELF5. ELF, E74-like ETS transcription factor 5; LLC, Lewis lung cancer.

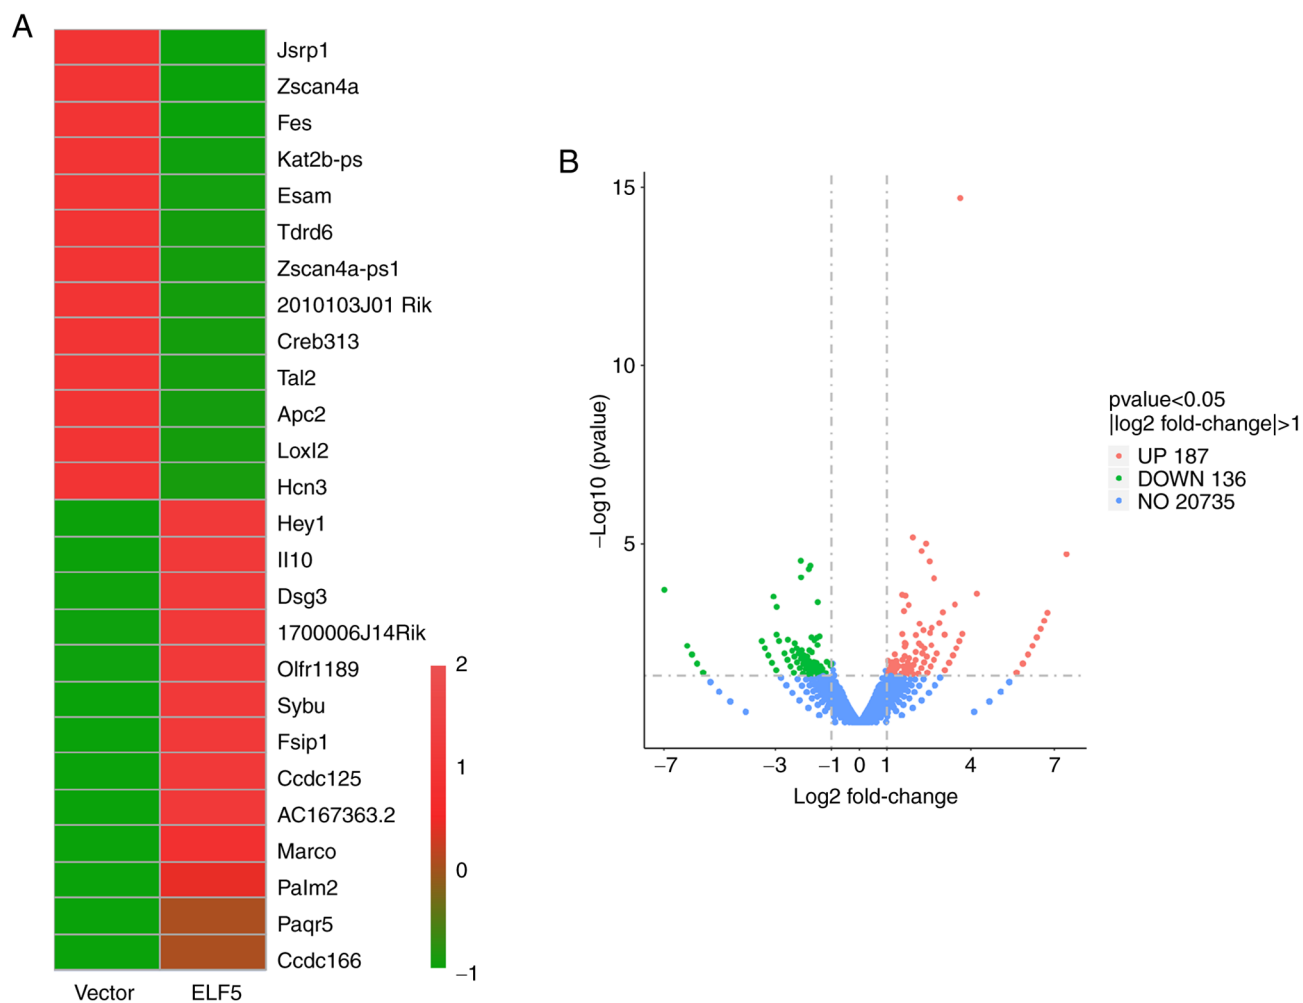

Supplement: Supplementary file 1 [file downloadSupplementary]
